# Supplementary material for: Genetic Loci of Plant Pathogenic Dickeya solani IPO 2222 Expressed in Contact with Weed-Host Bittersweet Nightshade (Solanum dulcamara L.) Plants
Source: MDPI journal article supplement (doi:10.3390/ijms25052794), 2024-02-28
Supplement: s1 [file s1]

## Supplementary Tables

**Supplementary Table S1.** Genetic loci of *D. solani* strain IPO 2222 Tn5 mutants regulated in the presence of *S. dulcamara* tissues

| No. | Mutant | Insertion name,<br>Tn5 locus    | Protein accession number,<br>protein name          | Transcriptional<br>organization (single<br>gene vs. operon)                                                                                                                                                                                      | Entry, KEGG pathway,<br>UniProt-based protein function                                                                         | Remarks                                                     | Homologs in different<br>bacterial species |
|-----|--------|---------------------------------|----------------------------------------------------|--------------------------------------------------------------------------------------------------------------------------------------------------------------------------------------------------------------------------------------------------|--------------------------------------------------------------------------------------------------------------------------------|-------------------------------------------------------------|--------------------------------------------|
| 1   | M69    | <i>ds69</i> ,<br>A4U42_RS11770  | WP_022632034,<br>glycosyl transferase              | operon, 12 genes:<br>A4U42_RS11790,<br>A4U42_RS11785,<br>A4U42_RS11780,<br>A4U42_RS11775,<br><b>A4U42_RS11770</b> ,<br>A4U42_RS11765,<br>A4U42_RS11760,<br>A4U42_RS11755,<br>A4U42_RS11750,<br>A4U42_RS11745,<br>A4U42_RS11740,<br>A4U42_RS11735 | glycosyltransferase family 4<br>protein, capsular glucan<br>synthase                                                           | in operon<br>together with<br><i>ds271</i> and <i>ds943</i> |                                            |
| 2   | M73    | <i>ds73</i> ,<br>A4U42_RS15630  | WP_022632758,<br>mannosyl transferase              | single gene                                                                                                                                                                                                                                      | glycosyltransferase family 4<br>protein                                                                                        |                                                             |                                            |
| 3   | M93    | <i>ds93</i> ,<br>A4U42_RS01565  | WP_022634127,<br>mycocerosate synthase             | operon, 2 genes:<br><b>A4U42_RS01565</b> ,<br>A4U42_RS01560                                                                                                                                                                                      | SDR family NAD(P)-dependent<br>oxidoreductase                                                                                  |                                                             |                                            |
| 4   | M106   | <i>ds106</i> ,<br>A4U42_RS13890 | WP_022632437<br>transcriptional regulator<br>GcvA  | single gene                                                                                                                                                                                                                                      | regulation of transcription,<br>LysR family transcriptional<br>regulator, glycine cleavage<br>system transcriptional activator |                                                             |                                            |
| 5   | M115   | <i>ds115</i> ,<br>A4U42_RS16110 | WP_022632856,<br>non-ribosomal peptide<br>synthase | operon, 8 genes:<br>A4U42_RS16130,<br>A4U42_RS16125,<br>A4U42_RS16120,<br>A4U42_RS16115,<br><b>A4U42_RS16110</b> ,<br>A4U42_RS16105,<br>A4U42_RS16100,<br>A4U42_RS16095                                                                          | no KEGG pathway,<br>non-ribosomal peptide synthase                                                                             | in operon<br>together with<br><i>ds255</i>                  |                                            |

|    |      |                                             |                                                         |                                                                                                                                                                                                      |                                                                                                      |                                                            |  |
|----|------|---------------------------------------------|---------------------------------------------------------|------------------------------------------------------------------------------------------------------------------------------------------------------------------------------------------------------|------------------------------------------------------------------------------------------------------|------------------------------------------------------------|--|
| 6  | M119 | <i>ds119</i> ,<br>A4U42_RS01450             | WP_022634107<br>FMN/FAD transporter                     | single gene                                                                                                                                                                                          | EmmdR/YeeO family<br>multidrug/toxin efflux MATE<br>transporter                                      |                                                            |  |
| 7  | M241 | <i>ds241</i> , <i>tgt</i><br>A4U42_RS14365  | WP_022632529,<br>tRNA guanosine<br>transglycosylase Tgt | operon, 2 genes:<br><i>queA</i> ,<br><i>tgt</i>                                                                                                                                                      | queueine tRNA-<br>ribosyltransferase, tRNA<br>guanosine transglycosylase Tgt                         |                                                            |  |
| 8  | M253 | <i>ds253</i> , <i>wbeA</i><br>A4U42_RS06140 | WP_022634991<br>WbeA                                    | operon, 7 genes:<br><i>gmd</i><br><b>A4U42_RS06140</b><br>A4U42_RS06135<br>A4U42_RS06130<br>A4U42_RS06125<br>A4U42_RS06115<br>A4U42_RS06110                                                          | entry not assigned,                                                                                  |                                                            |  |
| 9  | M255 | <i>ds255</i> ,<br>A4U42_RS16105             | WP_022632855,<br>non-ribosomal peptide<br>synthetase    | operon, 8 genes:<br>A4U42_RS16130,<br>A4U42_RS16125,<br>A4U42_RS16120,<br>A4U42_RS16115,<br>A4U42_RS16110,<br><b>A4U42_RS16105</b> ,<br>A4U42_RS16100,<br>A4U42_RS16095                              | non-ribosomal peptide<br>synthetase                                                                  | in operon<br>together with<br><i>ds115</i>                 |  |
| 10 | M264 | <i>ds264</i> ,<br>A4U42_RS11855             | WP_022632050,<br>hypothetical protein                   | operon, 3 genes:<br><b>A4U42_RS11855</b> ,<br>A4U42_RS11850,<br>A4U42_RS11845                                                                                                                        | entry not assigned, contains<br>endonuclease subunit and<br>chromosome segregation<br>ATPase subunit |                                                            |  |
| 11 | M271 | <i>ds271</i> ,<br>A4U42_RS11740             | WP_023637586,<br>capsular biosynthesis protein          | operon, 12 genes<br>A4U42_RS11790,<br>A4U42_RS11785,<br>A4U42_RS11780,<br>A4U42_RS11775,<br>A4U42_RS11770,<br>A4U42_RS11765,<br>A4U42_RS11760,<br>A4U42_RS11755,<br>A4U42_RS11750,<br>A4U42_RS11745, | polysaccharide biosynthesis<br>protein VpsM, outer membrane<br>beta-barrel protein                   | in operon<br>together with<br><i>ds69</i> and <i>ds943</i> |  |

|    |                     |                                     |                                                                                                              |                                                                              |                                                                                                                                                  |  |  |
|----|---------------------|-------------------------------------|--------------------------------------------------------------------------------------------------------------|------------------------------------------------------------------------------|--------------------------------------------------------------------------------------------------------------------------------------------------|--|--|
|    |                     |                                     |                                                                                                              | <b>A4U42_RS11740,</b><br>A4U42_RS11735                                       |                                                                                                                                                  |  |  |
| 12 | M273                | <i>ds273, bglF</i><br>A4U42_RS00580 | WP_022633945<br>PTS beta-glucoside<br>transporter subunit IIABC                                              | operon, 3 genes:<br><i>bglG,</i><br><b><i>bglF,</i></b><br><i>ascB</i>       | beta-glucoside PTS system<br>EIICBA component [EC:2.7.1.-]                                                                                       |  |  |
| 13 | M277                | <i>ds277,</i><br>A4U42_RS04070      | WP_022634595,<br>DltB protein for D-alanine<br>esterification of lipoteichoic<br>acid and wall teichoic acid | operon, 3 genes:<br><b>A4U42_RS04070,</b><br>A4U42_RS04065,<br>A4U42_RS04060 | membrane protein involved in<br>D-alanine export,<br>DltB protein for D-alanine<br>esterification of lipoteichoic acid<br>and wall teichoic acid |  |  |
| 14 | M278                | <i>ds278,</i><br>A4U42_RS02215      | WP_022634251<br>glycosyltransferase                                                                          | single gene                                                                  | glycosyltransferase, cellulose<br>synthase catalytic subunit (UDP-<br>forming)                                                                   |  |  |
| 15 | M281                | <i>ds281,</i><br>A4U42_RS17100      | WP_022633056,<br>predicted transcriptional<br>regulator YheO                                                 | single gene                                                                  | PAS domain-containing protein                                                                                                                    |  |  |
| 16 | M321                | <i>ds321,</i><br>A4U42_RS16640      | WP_022632961,<br>D-cysteine desulphydrase                                                                    | operon, 2 genes:<br><b>A4U42_RS16640</b><br>A4U42_RS16645                    | L-cysteate sulfo-lyase<br>[EC:4.4.1.25]                                                                                                          |  |  |
| 17 | M327                | <i>ds327,</i><br>A4U42_RS19655      | WP_022633559,<br>ClbS/DfsB family four-helix<br>bundle protein                                               | single gene                                                                  | ClbS/DfsB family four-helix<br>bundle protein                                                                                                    |  |  |
| 18 | M328<br>and<br>M880 | <i>ds328,</i><br>A4U42_RS17270      | WP_022633089,<br>glucarate transporter                                                                       | single gene                                                                  | MFS transporter, ACS family, D-<br>galactonate transporter                                                                                       |  |  |
| 19 | M468                | <i>ds468,</i><br>A4U42_RS17435      | WP_022633124,<br>conjugal transfer protein<br>TraR                                                           | operon, 3 genes:<br>A4U42_RS17445,<br>A4U42_RS17440,<br><b>A4U42_RS17435</b> | TraR/DksA family<br>transcriptional regulator                                                                                                    |  |  |
| 20 | M519                | <i>ds519, nifN</i><br>A4U42_RS06315 | WP_022635026,<br>nitrogen fixation protein<br>NifN                                                           | operon, 3 genes :<br><i>nifE</i><br><b><i>nifN</i></b><br>A4U42_RS06310      | nitrogenase molybdenum-iron<br>protein NifN                                                                                                      |  |  |
| 21 | M521                | <i>ds521,</i><br>A4U42_RS16075      | WP_223849466,<br>polyketide synthase                                                                         | single gene                                                                  | SDR family NAD(P)-dependent<br>oxidoreductase                                                                                                    |  |  |
| 22 | M564                | <i>ds564,</i><br>A4U42_RS04280      | WP_022634635,<br>nitrate reductase                                                                           | single gene                                                                  | nucleobase:cation symporter-1,<br>NCS1 family                                                                                                    |  |  |

|    |                     |                                                                              |                                                                                                 |                                                                                                                                  |                                                                                                                                 |  |  |
|----|---------------------|------------------------------------------------------------------------------|-------------------------------------------------------------------------------------------------|----------------------------------------------------------------------------------------------------------------------------------|---------------------------------------------------------------------------------------------------------------------------------|--|--|
| 23 | M573                | <i>ds573</i> ,<br>A4U42_RS11730                                              | WP_022632027,<br>undecaprenyl-phosphate<br>glucose phosphotransferase                           | single gene                                                                                                                      | L-talarate/galactarate<br>dehydratase                                                                                           |  |  |
| 24 | M578                | <i>ds578</i> ,<br>A4U42_RS17980                                              | WP_023637770,<br>peptide permease                                                               | operon, 4 genes:<br>A4U42_RS17995,<br>A4U42_RS17990,<br>A4U42_RS17985,<br><b>A4U42_RS17980</b>                                   | peptide/nickel transport system<br>permease protein, ABC<br>transporter permease                                                |  |  |
| 25 | M585                | <i>ds585</i> ,<br>A4U42_RS07980                                              | WP_022635320,<br>phage tail protein                                                             | operon, 2 genes:<br><b>A4U42_RS07980</b><br>A4U42_RS07975                                                                        | phage tail protein                                                                                                              |  |  |
| 26 | M596                | <i>ds596</i> , <i>uvrY</i> ( <i>expA</i> ,<br><i>gacA</i> )<br>A4U42_RS01590 | WP_022634131,<br>two-component system<br>response regulator UvrY<br>(GacA)                      | operon, 2 genes:<br><i>uvrY</i> ,<br><i>uvrC</i>                                                                                 | two-component system, NarL<br>family, invasion response<br>regulator UvrY, two component<br>system ExpA-ExpS in SRP<br>bacteria |  |  |
| 27 | M598<br>and<br>M980 | <i>ds598</i> ,<br>A4U42_RS08155                                              | WP_022635352,<br>malate permease                                                                | single gene                                                                                                                      | malate:Na <sup>+</sup> symporter, 2-<br>hydroxycarboxylate transporter<br>family protein                                        |  |  |
| 28 | M620<br>and<br>M940 | <i>ds620</i> , <i>dprA</i><br>A4U42_RS06665                                  | WP_022635094,<br>DNA-protecting protein<br>DprA                                                 | single gene                                                                                                                      | DNA processing protein,<br>DNA-protecting protein DprA                                                                          |  |  |
| 29 | M622                | <i>ds622</i> , <i>prfC</i><br>A4U42_RS11580                                  | WP_022631998,<br>peptide chain release factor 3                                                 | single gene                                                                                                                      | peptide chain release factor 3                                                                                                  |  |  |
| 30 | M635                | <i>ds635</i> , <i>menH</i><br>A4U42_RS14815                                  | WP_023637673,<br>2-succinyl-6-hydroxy-2,4-<br>cyclohexadiene-1-<br>carboxylate synthase         | operon, 6 genes:<br><i>menF</i><br><i>menD</i><br><b><i>menH</i></b><br><i>menB</i><br><i>menC</i><br><i>menE</i>                | 2-succinyl-6-hydroxy-2,4-<br>cyclohexadiene-1-carboxylate<br>synthase [EC:4.2.99.20]                                            |  |  |
| 31 | M652                | <i>ds652</i> , <i>sctR</i><br>A4U42_RS20675                                  | WP_022633761,<br>EscR/YscR/HrcR family type<br>III secretion system export<br>apparatus protein | operon, 11 genes:<br><i>sctW</i><br><i>sctV</i><br><i>sctD</i><br><i>scN</i><br><b><i>sctR</i></b><br><i>sctS</i><br><i>sctT</i> | type III secretion protein R,<br>type III secretion system export<br>apparatus subunit SctR                                     |  |  |

|    |      |                                             |                                                                       |                                                                                                                                                                                     |                                                                                               |                                                            |  |
|----|------|---------------------------------------------|-----------------------------------------------------------------------|-------------------------------------------------------------------------------------------------------------------------------------------------------------------------------------|-----------------------------------------------------------------------------------------------|------------------------------------------------------------|--|
|    |      |                                             |                                                                       | <i>sctU</i><br>A4U42_RS20670<br>A4U42_RS20665<br>A4U42_RS20660                                                                                                                      |                                                                                               |                                                            |  |
| 32 | M702 | <i>ds702</i> ,<br>A4U42_RS13765             | WP_230469717,<br>serine protease                                      | single gene                                                                                                                                                                         | subtilase-type serine protease<br>[EC:3.4.21.-], autotransporter<br>domain-containing protein |                                                            |  |
| 33 | M828 | <i>ds828</i> ,<br>A4U42_RS16290             | WP_022632893,<br>nickel ABC transporter<br>permease subunit NikC      | operon, 4 genes:<br>A4U42_RS16300,<br>A4U42_RS16295,<br><b>A4U42_RS16290</b> ,<br>A4U42_RS16285                                                                                     | nickel transport system<br>permease protein, ABC<br>transporter permease subunit              |                                                            |  |
| 34 | M854 | <i>ds854</i> ,<br>A4U42_RS09805             | WP_022631675,<br>glutathione ABC transporter<br>permease GsiC         | operon, 5 genes:<br>A4U42_RS09810,<br><b>A4U42_RS09805</b> ,<br>A4U42_RS09800,<br>A4U42_RS09795,<br>A4U42_RS09790                                                                   | glutathione transport system<br>permease protein                                              |                                                            |  |
| 35 | M884 | <i>ds884</i> ,<br>A4U42_RS00600             | WP_022633948,<br>peptidoglycan-binding<br>protein                     | single gene                                                                                                                                                                         | L,D-transpeptidase YcfS                                                                       |                                                            |  |
| 36 | M890 | <i>ds890</i> ,<br>A4U42_RS09520             | WP_022631619,<br>pseudouridine-5-phosphate<br>glycosidase             | operon, 2 genes:<br><b>A4U42_RS09520</b><br>A4U42_RS09525                                                                                                                           | pseudouridylate synthase<br>[EC:4.2.1.70],<br>pseudouridine-5'-phosphate<br>glycosidase       |                                                            |  |
| 37 | M937 | <i>ds937</i> , <i>glpX</i><br>A4U42_RS07915 | WP_022635307,<br>fructose 1,6-bisphosphatase                          | operon, 3 genes:<br><i>glpK</i><br><b><i>glpX</i></b><br>A4U42_RS07905                                                                                                              | fructose-1,6-bisphosphatase II<br>[EC:3.1.3.11],<br>class II fructose-bisphosphatase          |                                                            |  |
| 38 | M943 | <i>ds943</i> ,<br>A4U42_RS11735             | WP_023637585,<br>undecaprenyl-phosphate<br>glucose phosphotransferase | operon, 12 genes:<br>A4U42_RS11790,<br>A4U42_RS11785,<br>A4U42_RS11780,<br>A4U42_RS11775,<br>A4U42_RS11770,<br>A4U42_RS11765,<br>A4U42_RS11760,<br>A4U42_RS11755,<br>A4U42_RS11750, | undecaprenyl-phosphate<br>glucose phosphotransferase                                          | in operon<br>together with<br><i>ds271</i> and <i>ds69</i> |  |

|    |       |                                             |                                                         |                                                                                                 |                                                                                                                             |  |  |
|----|-------|---------------------------------------------|---------------------------------------------------------|-------------------------------------------------------------------------------------------------|-----------------------------------------------------------------------------------------------------------------------------|--|--|
|    |       |                                             |                                                         | A4U42_RS11745,<br>A4U42_RS11740,<br><b>A4U42_RS11735</b>                                        |                                                                                                                             |  |  |
| 39 | M945  | <i>ds945</i> ,<br>A4U42_RS12920             | WP_022632248,<br>ferredoxin                             | operon, 4 genes:<br>A4U42_RS12930,<br>A4U42_RS12925,<br><b>A4U42_RS12920</b> ,<br>A4U42_RS12915 | ferredoxin,<br>2Fe-2S iron-sulfur cluster-<br>binding protein                                                               |  |  |
| 40 | M946  | <i>ds946</i> ,<br>A4U42_RS12865             | WP_022632237,<br>aminotransferase                       | operon, 2 genes:<br><b>A4U42_RS12865</b><br>A4U42_RS12870                                       | putrescine aminotransferase<br>[EC:2.6.1.82],<br>aminotransferase class III-fold<br>pyridoxal phosphate-dependent<br>enzyme |  |  |
| 41 | M955  | <i>ds955</i> , <i>fdhF</i><br>A4U42_RS16455 | WP_022632925,<br>formate dehydrogenase<br>subunit alpha | operon, 2 genes:<br><i>fdhF</i><br>A4U42_RS16460                                                | formate dehydrogenase<br>(hydrogenase) [EC:1.17.98.4<br>1.17.98.-],<br>formate dehydrogenase subunit<br>alpha               |  |  |
| 42 | M1009 | <i>ds1009</i> ,<br>A4U42_RS16195            | WP_022632873,<br>ABC transporter                        | single gene                                                                                     | ATP-binding cassette, subfamily<br>F, member 3                                                                              |  |  |

**Supplementary Table S2.** Results of BIOLOG phenotypic microarrays GEN III and EcoPlate for 8 mutants expressing no or reduced symptoms on *S. dulcamara* planta

| GEN III           | IPO2222 | M241 | M253 | M264 | M271 | M277 | M278 | M281 | M596 |
|-------------------|---------|------|------|------|------|------|------|------|------|
| D-cellobiose      | +       | +    | -    | -    | +    | +    | +    | +    | +    |
| D-turanose        | -       | -    | -    | +    | -    | -    | -    | -    | -    |
| L-glutamic acid   | +       | -    | -    | +    | -    | +    | +    | +    | +    |
| D-glucuronic acid | +       | +    | -    | +    | -    | +    | +    | +    | +    |
| pH 5              | +       | +    | +    | +    | +    | +    | -    | +    | +    |
| 4% NaCl           | -       | -    | -    | -    | -    | +    | -    | -    | +    |
| 8% NaCl           | -       | -    | -    | -    | -    | -    | -    | -    | +    |
| fusidic acid      | -       | +    | -    | -    | -    | +    | -    | -    | +    |
| D-serine          | +       | +    | -    | -    | -    | -    | -    | -    | -    |
| guanidine HCl     | +       | +    | -    | +    | +    | +    | +    | +    | -    |
| lithium chloride  | +       | +    | +    | +    | -    | +    | -    | +    | +    |
| sodium butyrate   | -       | +    | -    | -    | -    | +    | -    | -    | +    |
| EcoPlate          | IPO2222 | M241 | M253 | M264 | M271 | M277 | M278 | M281 | M596 |
| D-xylose          | +       | +    | +    | +    | +    | +    | +    | -    | +    |
| L-asparagine      | +       | +    | +    | +    | +    | +    | +    | -    | +    |
| D-mannitol        | +       | +    | +    | +    | +    | +    | -    | +    | +    |
| L-serine          | +       | +    | +    | +    | -    | +    | +    | +    | +    |
| D-malic acid      | -       | -    | -    | +    | +    | +    | +    | -    | +    |

“+” – positive result (=change of medium color due to bacterial growth and metabolism)

“-” – negative result (=the lack of change of medium color = no bacterial growth/no bacterial metabolism)

**Supplementary Table S3.** List of PCR primers used in this study with amplification efficiencies in the applied setup

| Target locus | Primer name <sup>A</sup> | Primer sequence      | Amplicon length (bp) | E <sup>B</sup> | R <sup>2</sup> | Slope  | Reference  |
|--------------|--------------------------|----------------------|----------------------|----------------|----------------|--------|------------|
| A4U42_14370  | 7_M241_F                 | TATTTGATGGGGGTGGGTAA | 150                  | 102.1%         | 0.998          | -3.272 | This study |
|              | 7_M241_R                 | GTGTTTGGCGTTACGGATCT |                      |                |                |        |            |
| A4U42_06145  | 8_M253_F                 | AGCCGGACTCTATGGCACTA | 146                  | 97.5%          | 0.990          | -3.384 | This study |
|              | 8_M253_R                 | GAGCCTGTTTAATGGCTTCG |                      |                |                |        |            |
| A4U42_11860  | 10_V2_M264_F             | AAGTGTGTTTGTGGGCATGA | 121                  | 100.5%         | 0.992          | -3.311 | This study |
|              | 10_V2_M264_R             | GAGCGACTTCCATCGTCTCT |                      |                |                |        |            |
| A4U42_11745  | 11_M271_F                | TAGGCCGCACAGAGGATATT | 140                  | 90.1%          | 0.997          | -3.585 | This study |
|              | 11_M271_R                | CATAAAGCGGTAGCGAAAGC |                      |                |                |        |            |
| A4U42_04075  | 13_M277_F                | GCGCAGAATATTGGCATTTT | 127                  | 74.3%          | 0.997          | -4.146 | This study |
|              | 13_M277_R                | ACCACTGAAGCATGTTGTGC |                      |                |                |        |            |
| A4U42_02220  | 14_M278_F                | CTGGGATCACGTTTTCGTTT | 132                  | 74.9%          | 0.996          | -4.118 | This study |
|              | 14_M278_R                | TGCAATATAATCGGCATCCA |                      |                |                |        |            |
| A4U42_17105  | 15_M281_F                | GTCGCGTCTCTGTGTCTCAA | 147                  | 90.6%          | 0.973          | -3.568 | This study |
|              | 15_M281_R                | CTGATCGATACGCTGACGAA |                      |                |                |        |            |
| A4U42_01595  | 26_M596_F                | CGGTGAAGATGCGGTAAGAT | 108                  | 93.8%          | 0.990          | -3.479 | This study |



|             |           |                        |     |       |       |        |                |
|-------------|-----------|------------------------|-----|-------|-------|--------|----------------|
|             | 26_M596_R | CGTACAATTTGCGTGTTGC    |     |       |       |        |                |
| A4U42_03695 | V2_yhb_F  | CAGCACATGGGTCAACAAAC   | 126 | 91.1% | 0.997 | -3.555 | This study     |
|             | V2_yhb_R  | ACATGTACGATTCCGCATCA   |     |       |       |        |                |
| A4U42_05475 | lpxC_F    | ATGAACAGGTCGCCAATCG    | 93  | 84.2% | 0.999 | -3.771 | PMID: 32983224 |
|             | lpxC_R    | AGATGATTACCGTGTGCTGAAC |     |       |       |        |                |

<sup>A</sup> designation of the source Tn mutant is included in the primer name for all genes except for the reference genes *lpxC* and *yhbN*

<sup>B</sup> primer pair efficiency
